# Supplementary material for: Reversible mechanochromic and thermochromic luminescence switching via hydrogen-bond-directed assemblies in a zinc coordination complex
Source: Royal Society of Chemistry journal article supplement (doi:10.1039/c7ce01511a), 2017-01-01
Supplement: c7ce01511a1.pdf [file c7ce01511a1.pdf]

## Supporting Information

### **Reversible mechanochromic and thermochromic luminescent switching via the hydrogen-bond-directed assemblies in a zinc coordination complex**

**Rui Zou, Jie Zhang\*, Shuzhi Hu, Fei Hu, Haoyu Zhang and Zhiyong Fu \***

#### **General methods and materials**

All of the reagents were purchased from commercial channels and used without further purification. 4'-(4-pyridyl)-2,2':6',2''-terpyridine (PYTPY) was synthesized according to a reported method.<sup>S1</sup>ATA Instrument Q600 SDT thermogravimetric analyser was used to obtain the thermogravimetric analysis (TGA) curve in N<sub>2</sub> 100 ml·min<sup>-1</sup> at a rate of 10 °C·min<sup>-1</sup>. The X-ray powder diffraction (XRD) data were collected in the angular range of  $2\theta = 5^\circ - 50^\circ$  with a Bruker D8 Advance X-ray diffractometer using CuK $\alpha$  radiation ( $\lambda = 1.5406 \text{ \AA}$ ). UV-Vis diffuse reflectance spectra were carried out using a HITACHI U-3010 spectrometer, and a BaSO<sub>4</sub> plate was used as a 100% reflectance standard. Photoluminescence spectra were obtained using a F-7000 FL Spectrophotometer. The excited-state lifetimes were acquired using a Hamamatsu time-resolved spectrometer C11367-11 QuantaTaurus-Tau. IR spectra were characterized by a Bruker Tensor 27 FTIR spectrometer in the range of 4000-400 cm<sup>-1</sup> using KBr pellets. The C, H and N elemental analyses (EA) were performed on a Vario EL III elemental analyzer.

[S1] L. Hou, D. Li, W. J. Shi, Y. G. Yin and S. W. Ng, *Inorg. Chem.*, 2005, **44**, 7825.

### Synthesis of compound 1

A mixture of  $\text{ZnCl}_2$  (0.0136 g, 0.1mmol), PYTPY (0.0310 g, 0.1 mmol),  $\text{H}_2\text{BDC}$  (0.0166 g, 0.1 mmol) and  $\text{H}_2\text{O}$  (10 mL) was stirred for 30 min in air, and then transferred and sealed in a 25mL Teflon-lined steel bomb, which was heated at 160 °C for 48 h and then cooled to room temperature at a rate of 5 °C  $\text{h}^{-1}$ . Finally, pink crystals were collected by filtration, washed with DMF and distilled water for 3 times and then dried at room temperature for 12 h (12.3mg, 20.71 % based on PYTPY). Elemental Anal. Calc. (%) for  $\text{C}_{28}\text{H}_{24}\text{N}_4\text{O}_7\text{Zn}$  (593.88): C 56.58, H 4.04, N 9.43; found: C 57.97, H 4.08, N 9.43. IR data :3452(m), 3103(w), 3069(w), 3033(w), 1615(s), 1598(s), 1541(s), 1473(m), 1405(s), 1350(vs), 1243(m), 1154(m), 1079(m), 1011(m), 936(w), 896(w), 794(s), 746(s), 719(s), 638(m), 563(w), 509(m), 413(m).

### X-ray single crystal diffraction

The data were measured on a Agilent Gemini E X-ray single crystal diffractometer with graphite monochromated  $\text{Mo/K}\alpha$  radiation ( $\lambda = 0.71073 \text{ \AA}$ ). Data were collected at 173K, using the  $\omega$ - and  $\phi$ -scans to a maximum  $\theta$  value of 25.02°. Absorption corrections were performed using a multi-scan method. The structures were solved by direct methods with SHELXS-97 and refined by full-matrix least-square technique on  $F^2$  with SHELXL-97.

CCDC 1562985 contains the supplementary crystallographic data for this paper. These data can be obtained free of charge from the Cambridge Crystallographic Data Centre via [www.ccdc.cam.ac.uk/data\\_request/cif](http://www.ccdc.cam.ac.uk/data_request/cif).

**Table S1. Crystal data for 1.**

|                                   |                                                                  |                |
|-----------------------------------|------------------------------------------------------------------|----------------|
| Empirical formula                 | C <sub>28</sub> H <sub>24</sub> N <sub>4</sub> O <sub>7</sub> Zn |                |
| Formula weight                    | 593.88 g /mol                                                    |                |
| Crystal system                    | Triclinic                                                        |                |
| Space group                       | <i>P</i> -1                                                      |                |
| Unit cell dimensions              | a = 8.7484(7) Å                                                  | α = 80.673(8)° |
|                                   | b = 10.2091(13) Å                                                | β = 89.866(6)° |
|                                   | c = 14.7961(11) Å                                                | γ = 70.745(9)° |
| Volume                            | 1229.2(2) Å <sup>3</sup>                                         |                |
| F (000)                           | 612                                                              |                |
| Goodness-of-fit on F <sup>2</sup> | 1.067                                                            |                |
| Final R indices [I>2σ (I)]        | R1 = 0.0510, wR2 = 0.1237                                        |                |
| R indices (all data)              | R1 = 0.0643, wR2 = 0.1363                                        |                |

$$^aR_1 = \sum ||F_o| - |F_c|| / \sum |F_o|, \quad ^b wR_2 = [\sum [w(F_2 o - F_2 c)^2] / \sum [w(F_2 o)^2]]^{1/2}.$$

**Table S2 The hydrogen bonding data in the structure of 1.**

|   | Donor---H....Acceptor | D...A    | D - H...A |
|---|-----------------------|----------|-----------|
| 1 | O5 --H....N1          | 2.927(5) | 151(6)    |
| 2 | O5--H....O1           | 2.892(5) | 157(7)    |
| 3 | O6--H....O5           | 2.860(6) | 178(6)    |
| 4 | O6--H....O5           | 2.947(6) | 157(4)    |
| 5 | O7--H....O6           | 2.787(8) | 150       |
| 6 | O7--H....O3           | 2.942(7) | 137       |

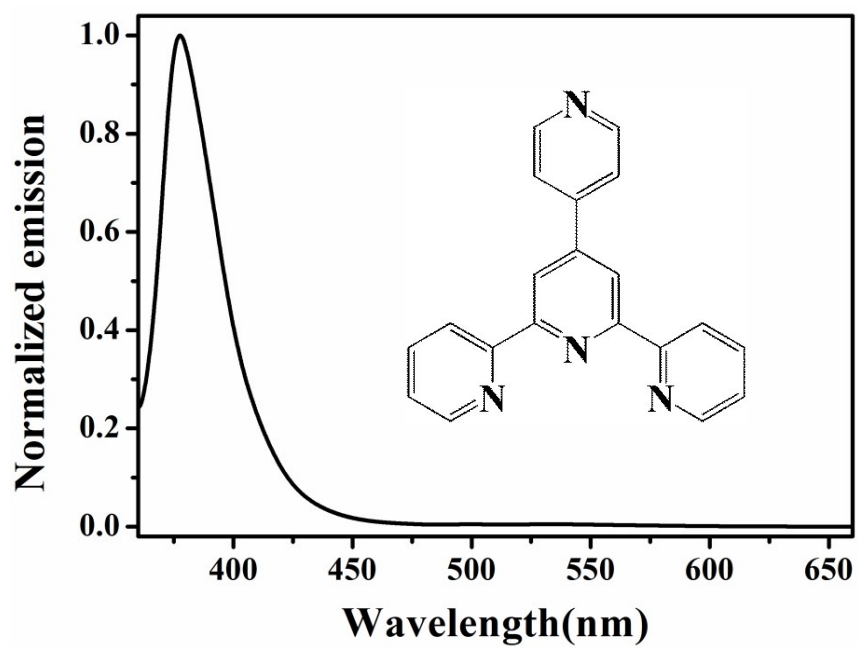

**Fig. S1** PL spectrum of **PYTPY**, upon excitation at 345nm.

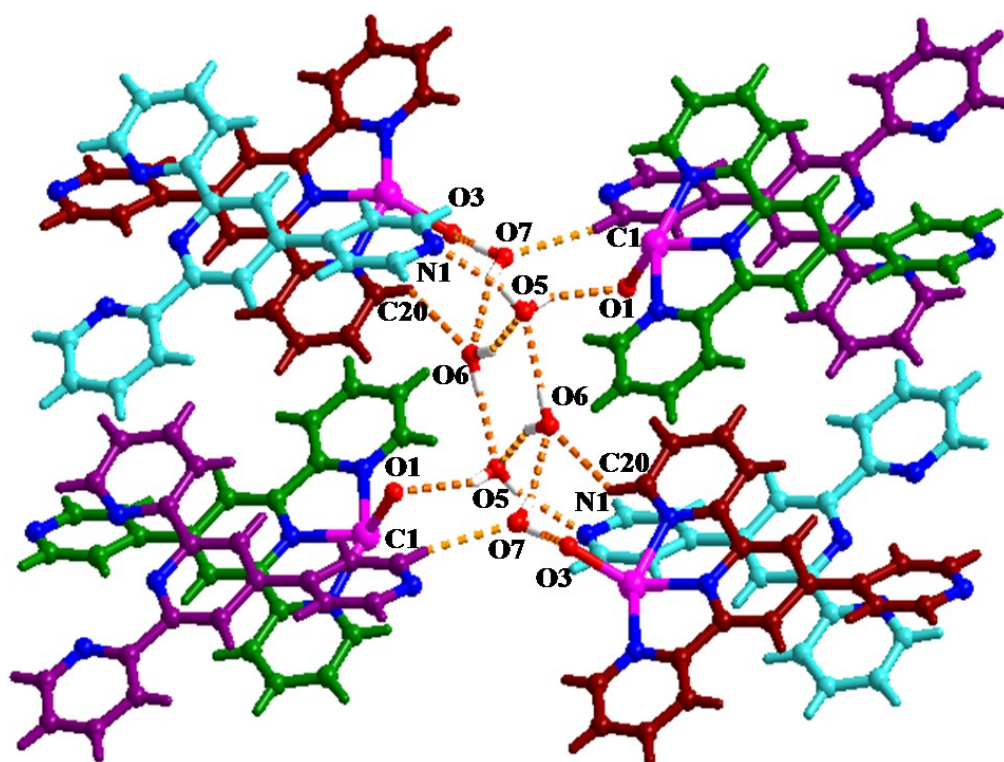

**Fig. S2** The hydrogen bonding network in 1.

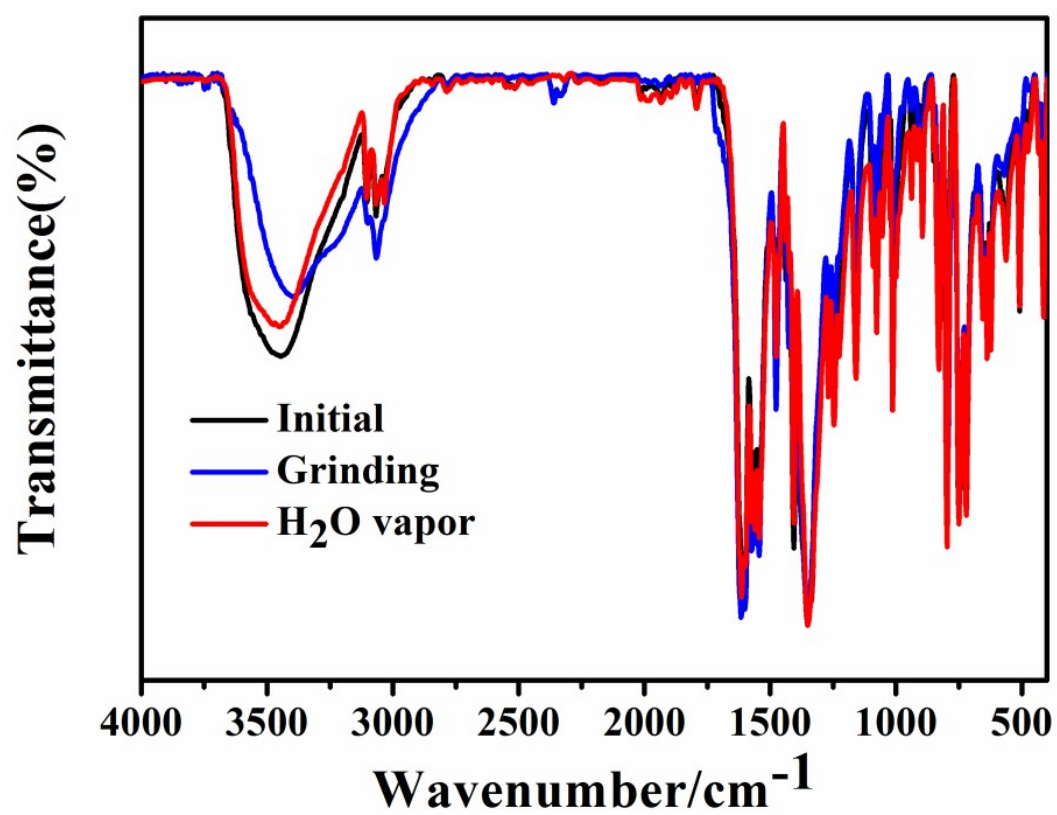

**Fig. S3** IR spectra of **1** before and after grinding, and being treated by water vapor.

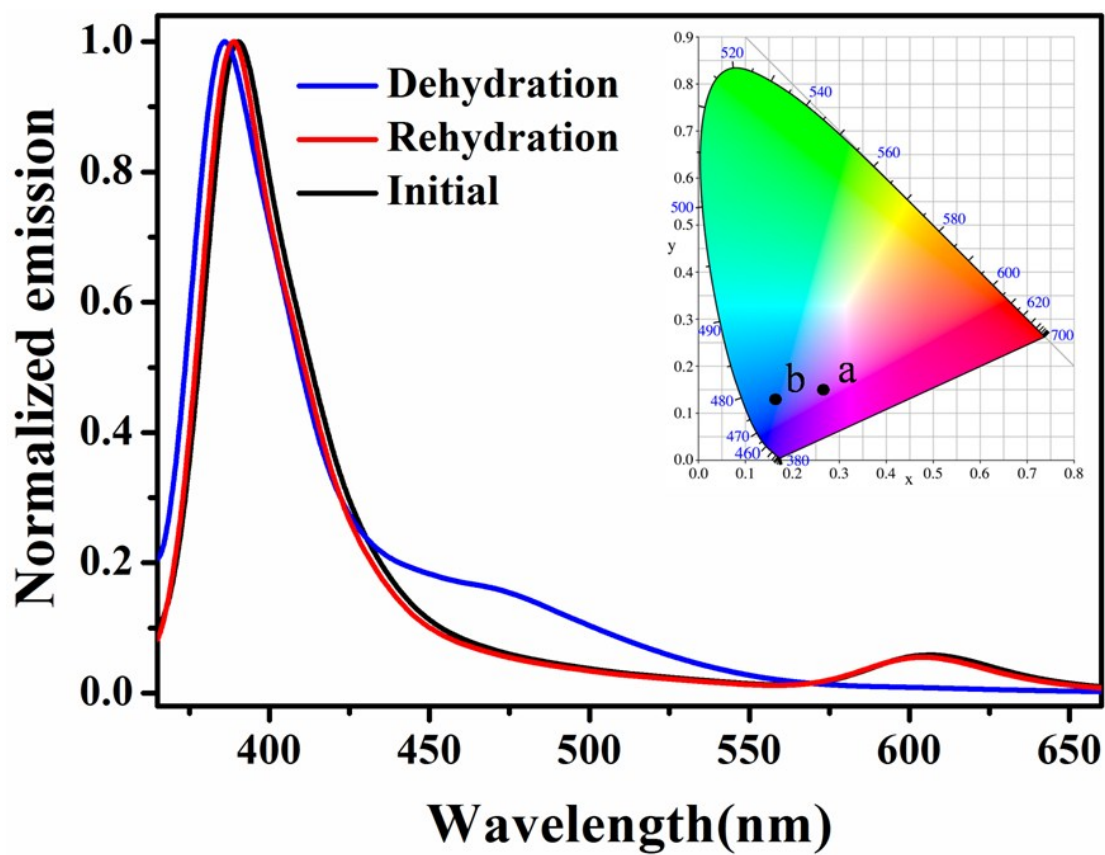

**Fig. S4** PL spectra of **1** before (black) and after dehydration (blue) and being treated by water vapor (red). Inset: the CIE chromaticity coordinates: (a) initial sample (0.2645, 0.1461), (b) dehydration sample (0.1641, 0.1286).

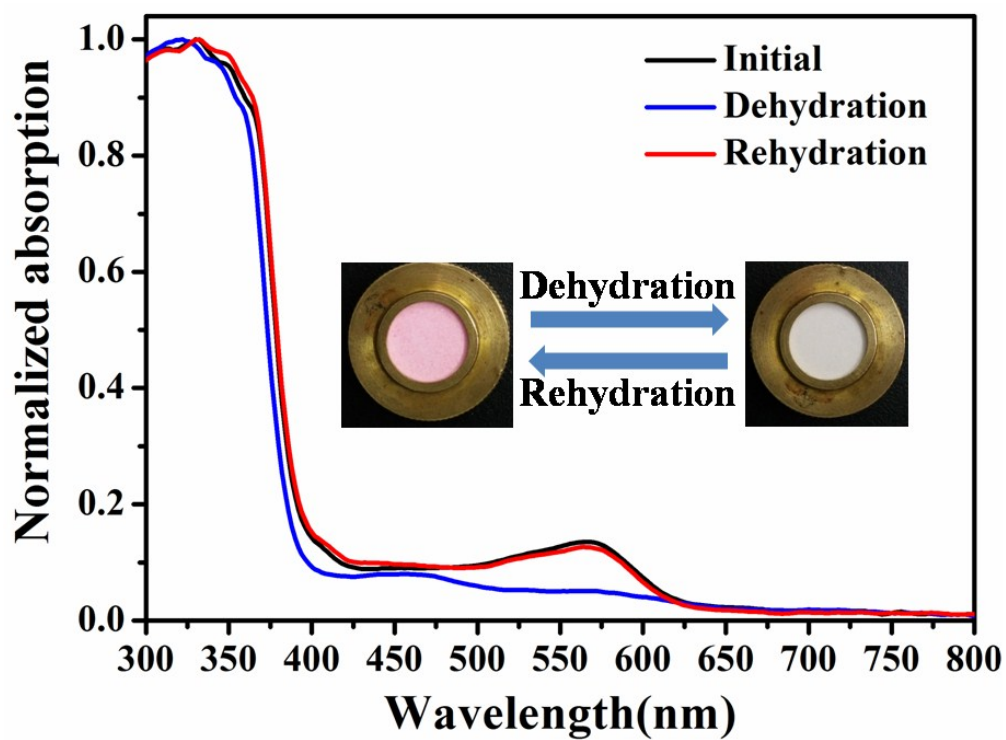

**Fig. S5** UV-Vis spectrum of **1** before (black) and after dehydration (blue) and being treated by water vapor (red).



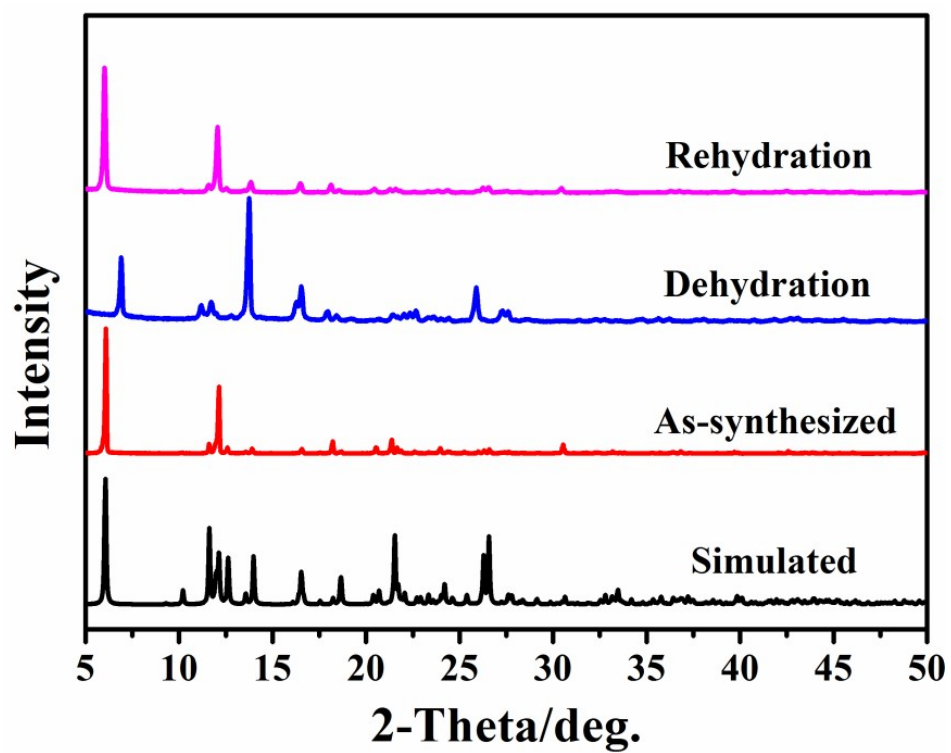

**Fig. S6** PXRD data of **1** before and after dehydration, simulated and being treated by water vapor.

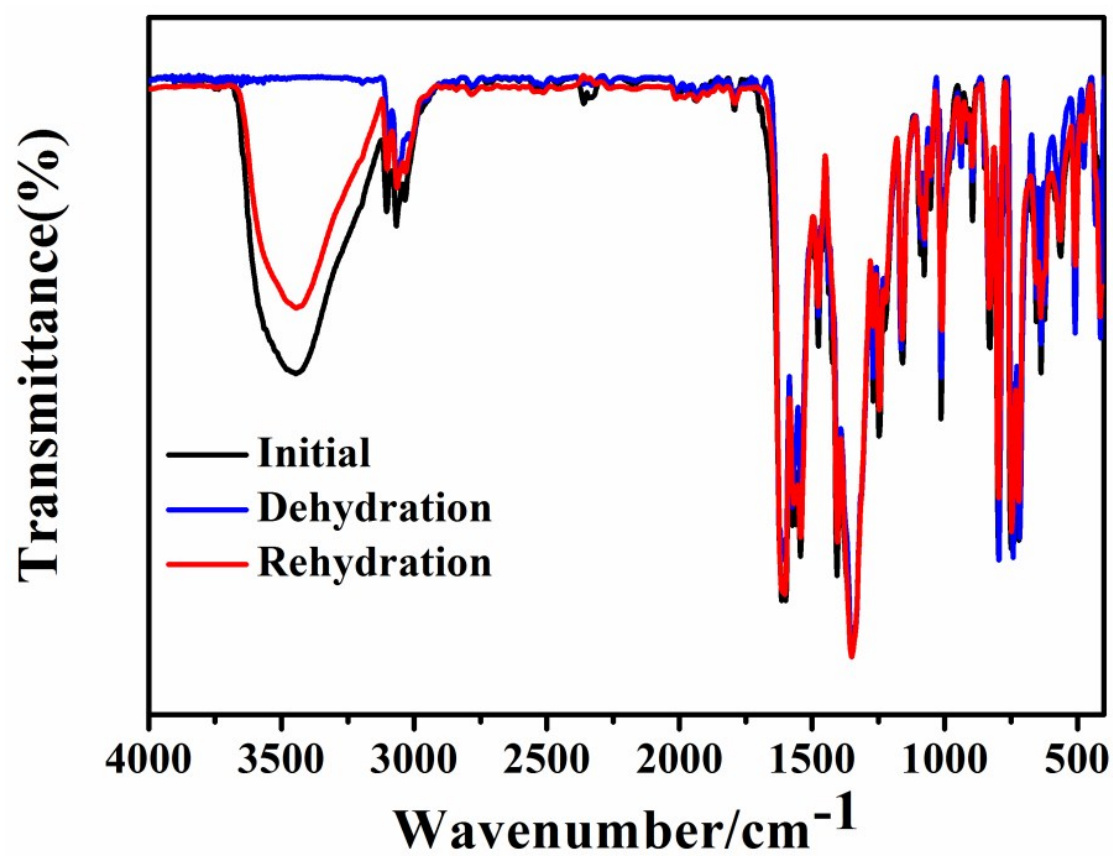

**Fig. S7** IR spectra of **1** before and after dehydration, and being treated by water vapor.

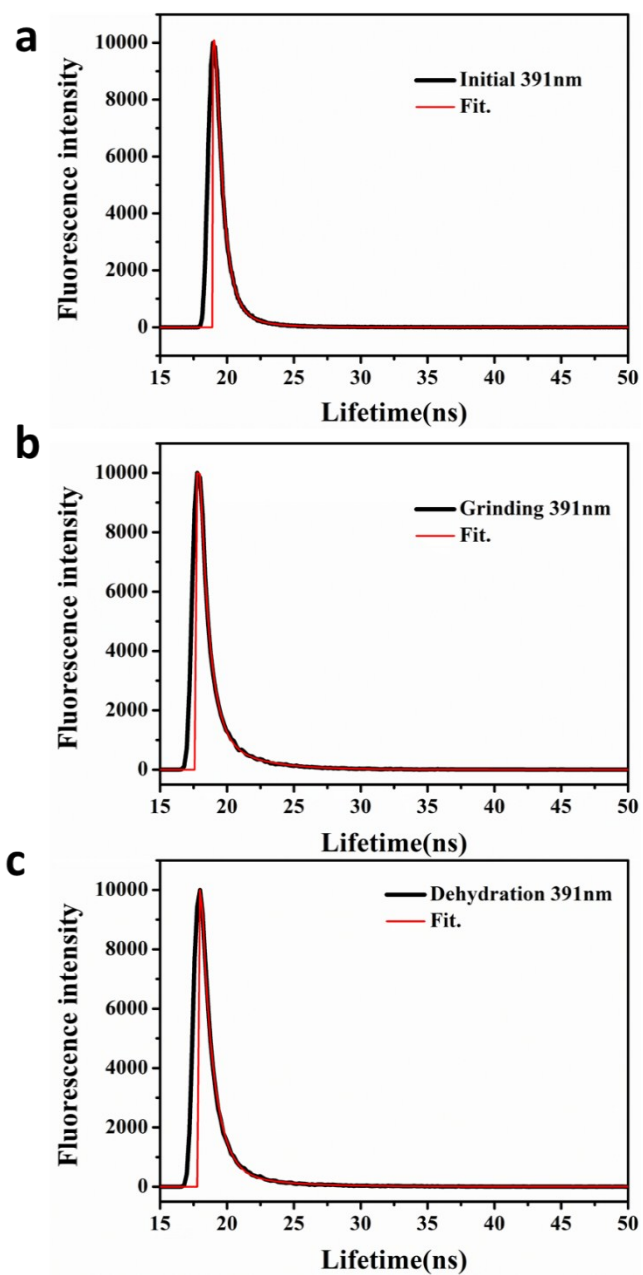

**Fig. S8** Solid-state fluorescence decay profiles of initial sample (a), ground sample (b) and dehydration sample (c).

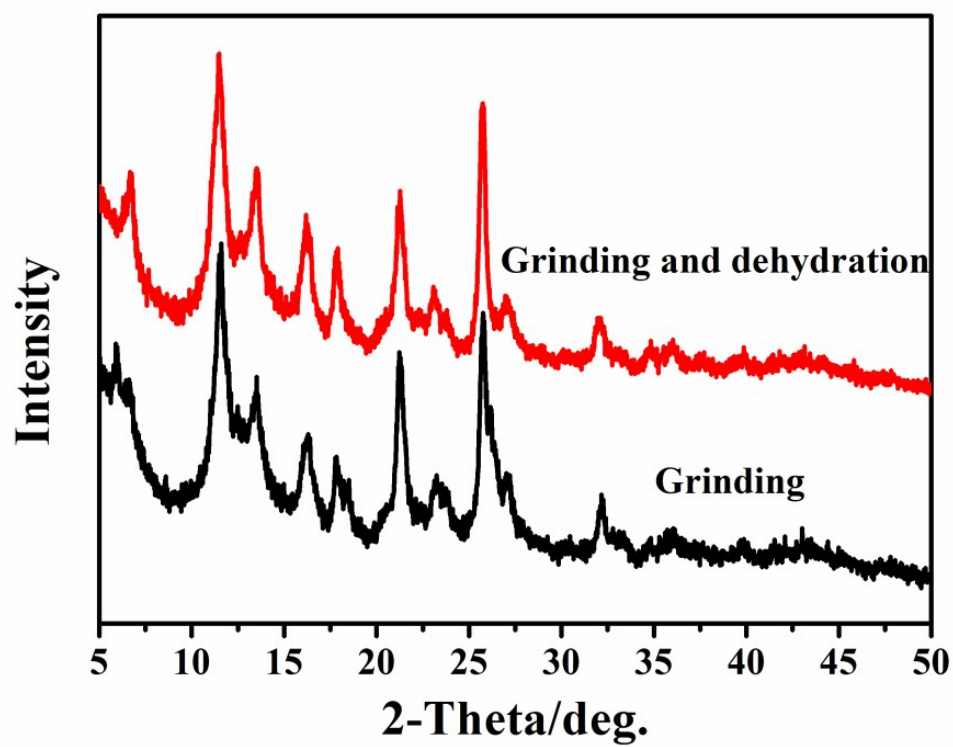

**Fig. S9** PXRD patterns of the ground sample before (black) and after (red) dehydration.

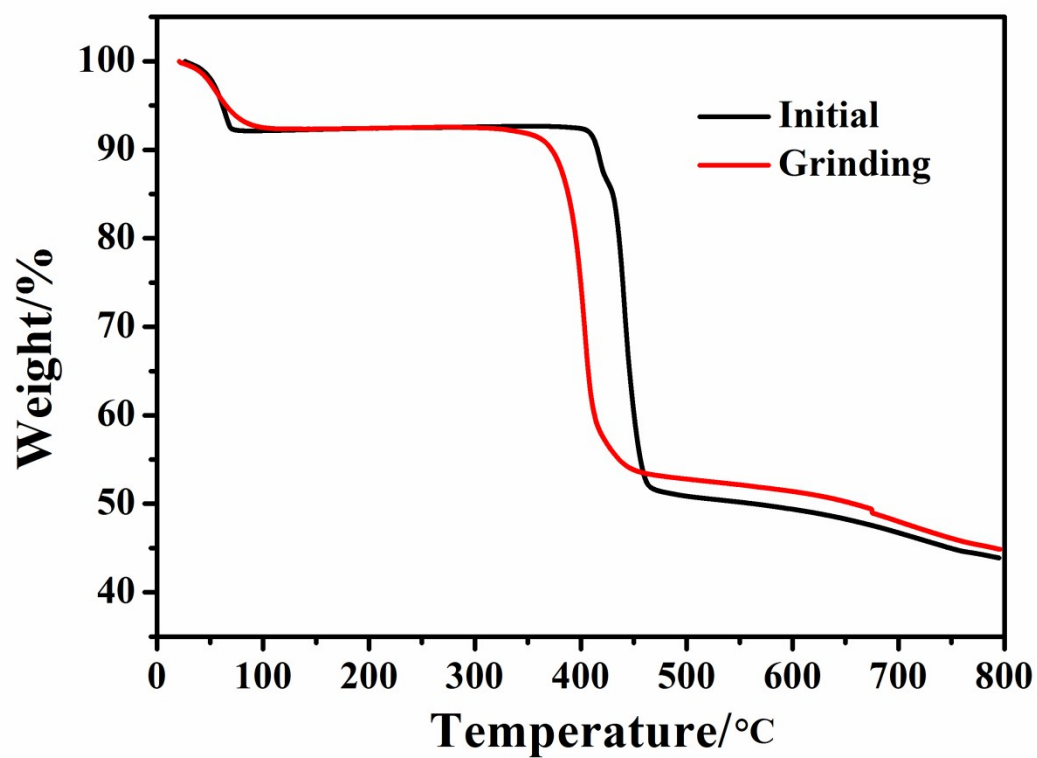

**Fig. S10** Thermal gravimetric curve of compound **1**: the intact sample (black) and the ground sample (red).

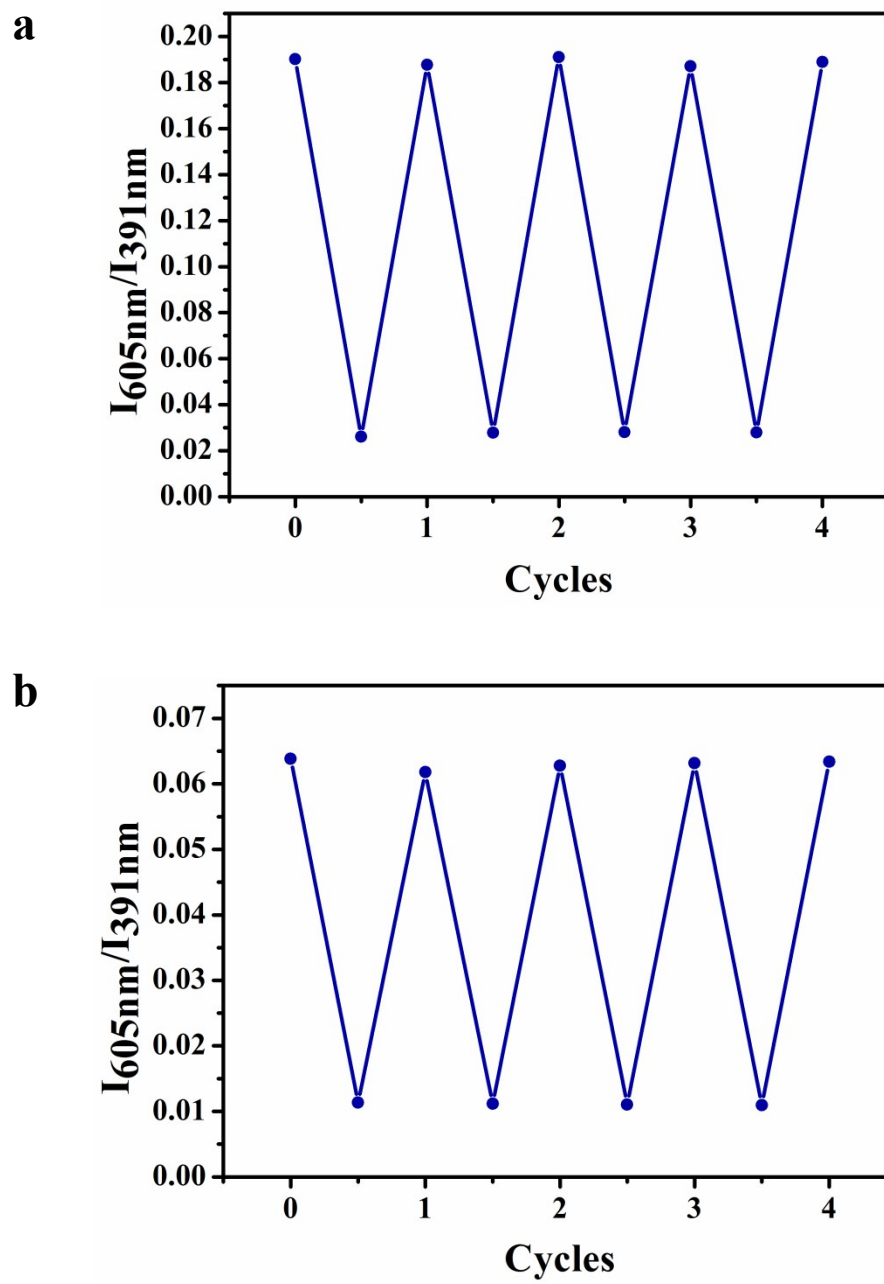

**Fig. S11** (a) Mechanochromic cycles; (b) Thermochromic cycles.
